# Supplementary material for: LINC00461/miR-4478/E2F1 feedback loop promotes non-small cell lung cancer cell proliferation and migration
Source: Oxford University Press journal article supplement (doi:10.1042/bsr20191345), 2020-01-14
Supplement: bsr-2019-1345_supp.pdf [file bsr-2019-1345_supp.pdf]

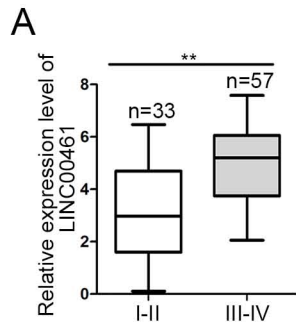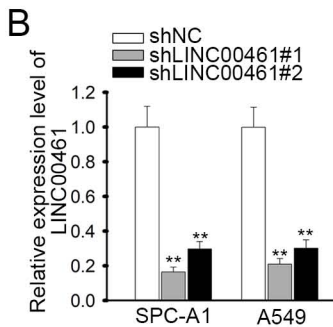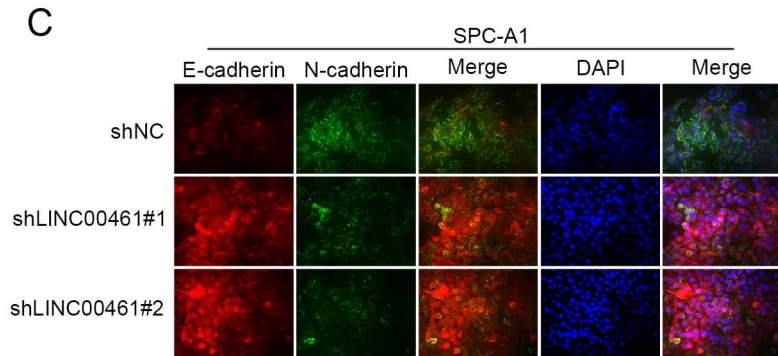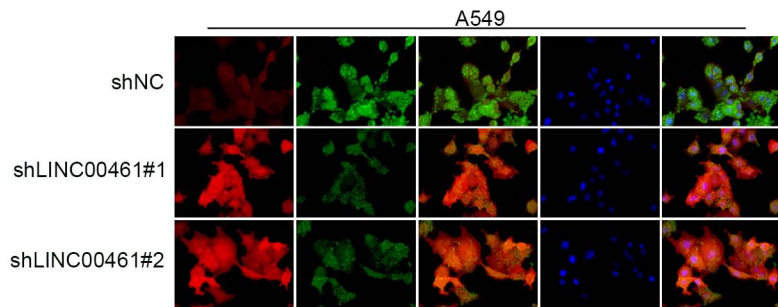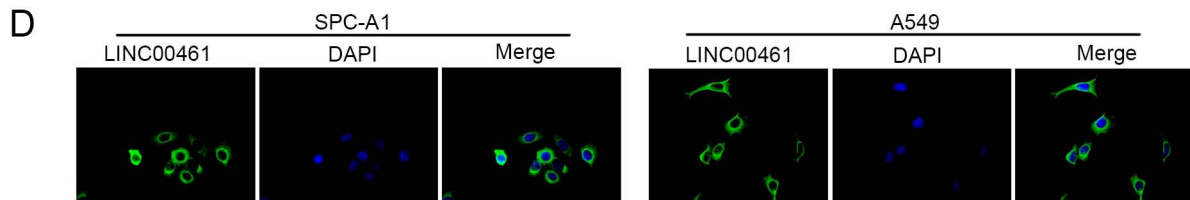

**Figure S1:** (A) LINC00461 expressions in NSCLC tissues at I-II and III-IV stages. (B) Knockdown of LINC00461 was conducted via shRNAs targeting LINC00461. (C) Effect of shLINC00461 on EMT process was evaluated via immunofluorescence. (D) FISH assay was performed to determine LINC00461 subcellular localization. \*\*  $P < 0.01$ .

A

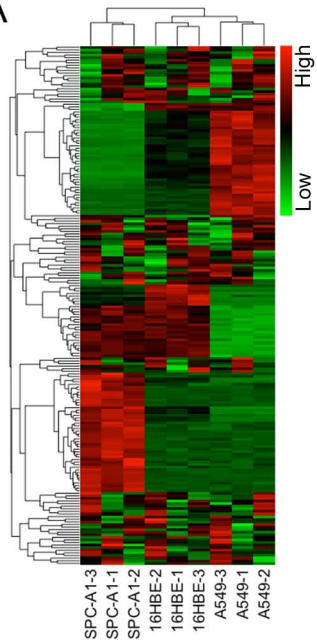

B

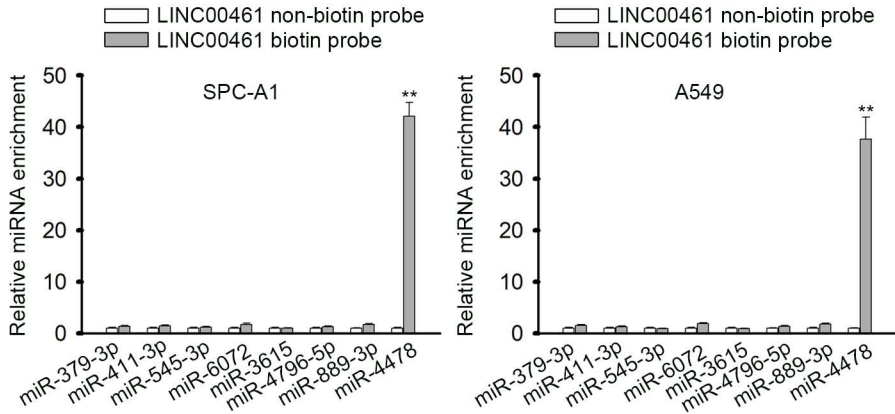

**Figure S2:** (A) 200 miRNAs with higher LINC00461-binding score were obtained from DIANA-lncBase. RT-qPCR examined the expression of these miRNAs in NSCLC cell lines and 16HBE cell line. (B) RNA pull-down assay examined the interaction between LINC00461 and eight down-regulated miRNAs in NSCLC. \*\* P < 0.01.
